# Supplementary material
Source: MDPI journal article supplement (https://www.mdpi.com/1999-4907/7/6/120)
Supplement: s1 [file s1]

Supplementary Materials: How Do Urban Forests Compare? Tree Diversity in Urban and Periurban Forests of the Southeastern US

Amy Blood, Gregory Starr, Francisco Escobedo, Art Chappelka and Christina Staudhammer

**Table S1.** Common species by location in urban and periurban forests of the southeastern United States. The most common three species for every location by forest type and relative abundance are presented. UF = Urban forests, PF = Periurban forests.

| **Location** | **Most Common Species (Relative Abundance, %)** | |
| --- | --- | --- |
| **Periurban Forest** | **Urban Forest** |
| Abingdon | *Acer rubrum* (17), *Liriodendron tulipifera* (11), *Oxydendrum arboretum* (8) | *Robinia pseudoacacia* (11), *Liriodendron tulipifera* (9), *Rhus hirta* (6) |
| Atlanta | *Liquidambar styraciflua* (25), *Pinus taeda* (20), *Liriodendron tulipifera* (6) | *Pinus taeda* (15), *Liquidambar styraciflua* (11), *Quercus nigra* (8) |
| Charlottesville | *Acer rubrum* (16), *Nyssa sylvatica* (10), *Pinus virginiana* (9) | *Cornus florida* (12), *Acer rubrum* (5), *Lindera benzoin* (5) |
| East Orlando | *Sabal palmetto* (15), *Quercus virginiana* (10), *Quercus laurifolia* (9) | *Taxodium distichum* (14), *Quercus nigra* (9), *Pinus palustris* (6) |
| Falls Church | *Acer rubrum* (17), *Asimina triloba* (14),  *Quercus alba* (9) | *Cornus florida* (7), *Juniperus virginiana* (6), *Pinus strobus* (6) |
| Gainesville | *Pinus elliottii* (36), *Pinus taeda* (15),  *Gordonia lasianthus* (8) | *Quercus laurifolia* (12), *Quercus nigra* (10), *Pinus elliottii* (9) |
| Roanoke | *Nyssa sylvatica* (13), *Acer rubrum* (12), *Quercus prinus* (10) | *Ailanthus altissima* (12), *Cornus florida* (9), *Pinus virginiana* (7) |
| Winchester | *Acer rubrum* (15), *Quercus prinus* (9), *Cornus florida* (9) | *Ailanthus altissima* (11), *Ulmus pumila* (10), *Celtis occidentalis* (6) |

**Table S2.** PERMANOVA test results with 999 permutations according to forest type and ecozones of southeastern United States. Forest type = Peri-urban vs. Urban forest; Ecological province was defined by USDA Forest Service ecozones.

|  | **Df** | **SS** | **MS** | **Pseudo-F** | ***P*-value** |
| --- | --- | --- | --- | --- | --- |
| Forest Type | 1 | 0.745 | 0.74501 | 5.0031 | 0.001 |
| Province | 2 | 1.443 | 0.7215 | 4.8452 | 0.001 |
| Residuals | 12 | 1.7869 | 0.14891 |  |  |

Df, Degrees of Freedom; SS, Sum of Squares; MS, Mean Square.


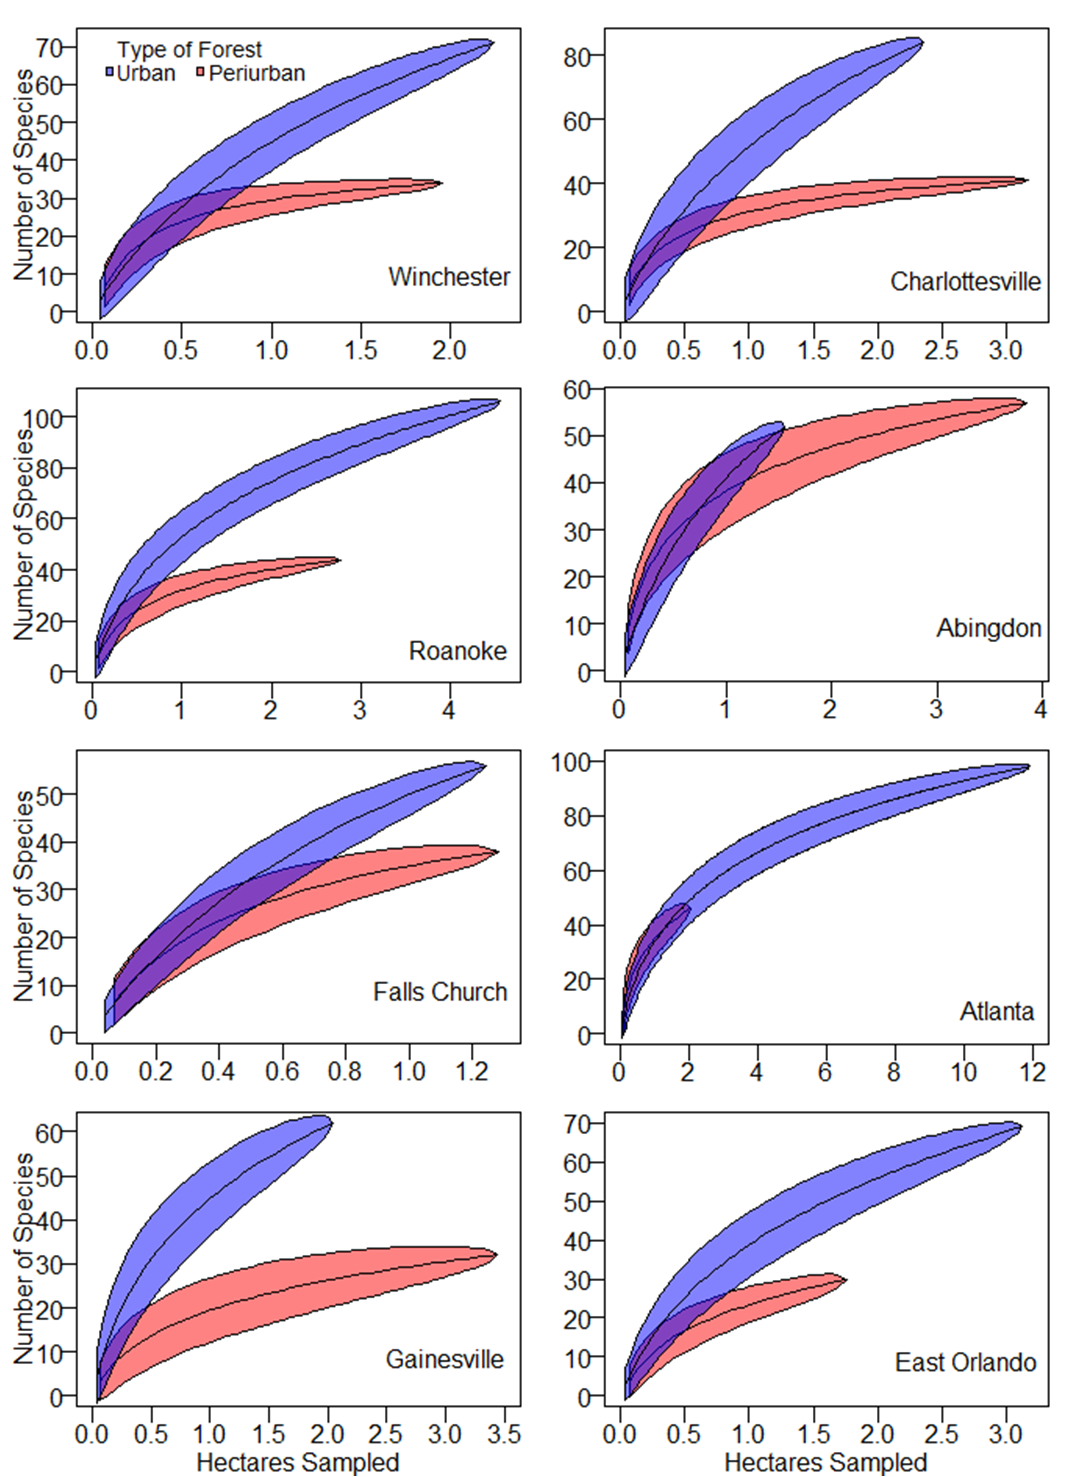


**Figure S1.** Tree species accumulation curves for each of 8 urban and periurban forest locations in the southeastern United States. Shaded areas represent 95% confidence intervals.


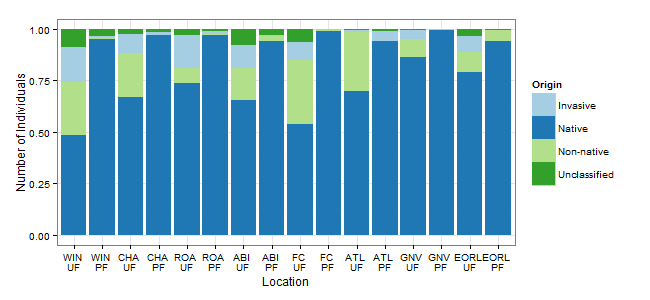


**Figure S2.** Percent of observed tree individuals classified according to origin for each of 8 urban and periurban forest locations in the southeastern United States. (ATL = Atlanta, GA; CHA = Charlottesville, VA; EORL = East Orlando, FL; FC = Falls Church, VA; GNV = Gainesville, FL; ROA = Roanoke, VA; ABI = Abingdon, VA; WIN = Winchester, VA; UF = Urban forests, PF = Periurban forests.) Locations are listed North-South, with the exception of Falls Church which is listed more southerly to reflect its ecological province.
